# Supplementary material
Source: MDPI journal article supplement (https://www.mdpi.com/2311-7524/8/8/747)
Supplement: s1 [file s1]

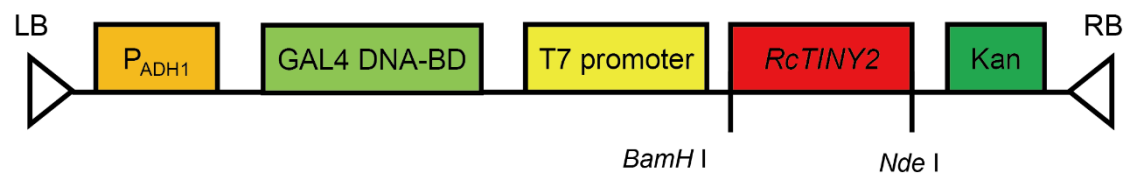

**Supplementary Figure S1. Schematic representation of constructs used in yeast transactivation system.**

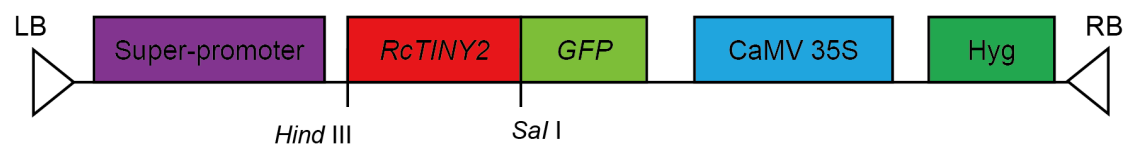

**Supplementary Figure S2. Schematic representation of constructs used in overexpression in Arabidopsis**

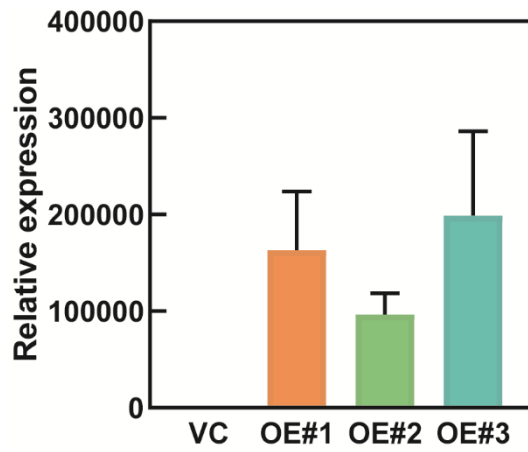

**Supplementary Figure S3. RT-qPCR was used to detect the overexpression efficiency of RctINY2 transgenic lines**

**Table S1 Primer sequence used in this study**

| <b>qRT-PCR primers</b>                              |                                                 |
|-----------------------------------------------------|-------------------------------------------------|
| RcTINY2q-F                                          | TTCAGAAACTGATAGCAGCTCATCC                       |
| RcTINY2q-R                                          | CGGATTTTCAGAGACCCATTTGC                         |
| RcUBI2-F                                            | GCCCTGGTGCGTTCCCAACTG                           |
| RcUBI2-R                                            | CCTGCGTGTCTGTCCGCATTG                           |
| RcABF2-F                                            | GCCTCAACTCGGTGAGTGAA□                           |
| RcABF2-R                                            | ACATCAGGACCCGAAAACCC□                           |
| RcATAF1-F                                           | GACGTGGATCGAACGCCTC                             |
| RcATAF1-R                                           | CATCAGATTCTCCGGCTTCACG                          |
| RcRD22-F                                            | ATGGTTTTACGGTTTTACCAAAGA                        |
| RcRD22-R                                            | CGGCCACTTACACTATCCTTTC                          |
| RcDREB1-F                                           | CTCTCAGCTAAGAAAACCAAACCAG                       |
| RcDREB1-R                                           | TTAAAAGCAAGCTGGACACCTGT                         |
| RcNCED1-F                                           | ATGTCCGAAGACGACTTGCC                            |
| RcNCED1-R                                           | TGGGCGATCATGGTGGAC                              |
| RcPR4-F                                             | GTATATTAATCAGTTATCAGAAAATGGC                    |
| RcPR4-R                                             | ACGTTCGTAGCACTTTGCG                             |
| RcCIPK6-F                                           | GCAGAGAGATCAACAGAGCACT                          |
| RcCIPK6-R                                           | TCATCTCTCTGCATTCCCTAAA                          |
| RcMKK3-F                                            | AGTGATACTAAAATATGCTCGTAAGAC                     |
| RcMKK3-R                                            | GTCGAAGGTGACCAAATGAC                            |
| RcMKK9-F                                            | AATTTAATCCCAACCTCCCCCTA                         |
| RcMKK9-R                                            | GGCAAGGGGAGGCTGAGG                              |
| <b><i>RcTINY2</i> overexpression clone primers</b>  |                                                 |
| RcTINY2-F                                           | ATGAGTAGTACTACTGAAACTCAG                        |
| RcTINY2-R                                           | ATAATCCCATAACAAACCCCTCAAAG                      |
| <b><i>RcTINY2</i> overexpression vector primers</b> |                                                 |
| RcTINY2T-F                                          | GCTCTAGAATGAGTAGTACTACTGAAACTCAG                |
| RcTINY2T-R                                          | CGGAATTCATAATCCCATAACAAACCCCTCAAAG              |
| <b><i>RcTINY2</i> silencing clone primers</b>       |                                                 |
| RcTINY2-V-F                                         | AAGGCTGCCCAAATGCAC                              |
| RcTINY2-V-R                                         | TTAATAATCCCATAACAAACCCCTCA                      |
| <b><i>RcTINY2</i> silencing vector primer</b>       |                                                 |
| RcTINY2T-V-F                                        | cctccatgggatccggtaccAAGGCTGCCCAAATGCACC         |
| RcTINY2T-V-R                                        | ggcctcgagacgctgagctcTTAATAATCCCATAACAAACCCCTCAA |

**Table S2 Cis-regulatory element prediction of RcTINY2**

| <b>Name</b> | <b>position</b> |      | <b>Description</b>                                                              |
|-------------|-----------------|------|---------------------------------------------------------------------------------|
| MYB         | 105             | 111  | cis-acting element involved in the dehydration and abscisic acid responsiveness |
| MYB         | 292             | 298  | cis-acting element involved in the dehydration and abscisic acid responsiveness |
| MYB         | 433             | 439  | cis-acting element involved in the dehydration and abscisic acid responsiveness |
| STRE        | 140             | 145  | stress-responsive element                                                       |
| STRE        | 231             | 236  | stress-responsive element                                                       |
| STRE        | 302             | 307  | stress-responsive element                                                       |
| STRE        | 488             | 493  | stress-responsive element                                                       |
| STRE        | 1650            | 1655 | stress-responsive element                                                       |
| STRE        | 1747            | 1752 | stress-responsive element                                                       |
| MYC         | 1               | 7    | cis-acting element involved in the dehydration and abscisic acid responsiveness |
| MYC         | 355             | 361  | cis-acting element involved in the dehydration and abscisic acid responsiveness |
| MYC         | 542             | 548  | cis-acting element involved in the dehydration and abscisic acid responsiveness |
| MYC         | 741             | 747  | cis-acting element involved in the dehydration and abscisic acid responsiveness |
| ARE         | 41              | 47   | cis-acting regulatory element essential for the anaerobic induction             |
| ARE         | 1890            | 1896 | cis-acting regulatory element essential for the anaerobic induction             |
| ABRE        | 1425            | 1432 | cis-acting element involved in the abscisic acid responsiveness                 |

**Table S3 ABA and stress-related genes information**

| Gene name | ID                     | Description                                       | References           |
|-----------|------------------------|---------------------------------------------------|----------------------|
| RcABF2    | RcHm_v2.0_Chr6g0244361 | ARM REPEAT PROTEIN INTERACTING WITH ABF2          | Raymond et al., 2018 |
| RcATAF1   | RcHm_v2.0_Chr6g0296281 | NAC domain-containing protein                     | Geng et al., 2022    |
| RcRD22    | RcHm_v2.0_Chr1g0356161 | BURP domain protein RD22                          | Fu et al., 2021      |
| RcDREB1   | RcHm_v2.0_Chr7g0199301 | Dehydration-responsive element-binding protein 1  | Wang et al., 2009    |
| RcNCED1   | RcHm_v2.0_Chr5g0027901 | 9-cis-epoxycarotenoid dioxygenase NCED1           | Raymond et al., 2018 |
| RcPR4     | RcHm_v2.0_Chr3g0450761 | Pathogenesis-related protein PR-4B                | Raymond et al., 2018 |
| RcCIPK6   | RcHm_v2.0_Chr2g0085831 | CBL-interacting serine/threonine-protein kinase 6 | Raymond et al., 2018 |
| RcMKK3    | RcHm_v2.0_Chr2g0131721 | Mitogen-activated protein kinase kinase 3         | Raymond et al., 2018 |
| RcMKK9    | RcHm_v2.0_Chr7g0197511 | Mitogen-activated protein kinase kinase 9         | Raymond et al., 2018 |

**References**

- Fu, L.; Zhang, Z.; Wang, H.; Zhao, X.; Su, L.; Geng, L.; Lu, Y.; Tong, B.; Liu, Q.; Jiang, X. Genome-wide analysis of *BURP* genes and identification of a BURP-V gene *RcBURP4* in *Rosa chinesis*. *Plant Cell Rep.* **2021**, *41*, 395–413.
- Geng, L.; Su, L.; Fu, L.; Lin, S.; Zhang, J.; Liu, Q.; Jiang, X. Genome-wide analysis of the rose (*Rosa chinensis*) NAC family and characterization of *RcNAC091*. *Plant Mol. Biol.* **2022**, *108*, 605–619.
- Raymond, O.; Gouzy, J.; Just, J.; Badouin, H.; Verdenaud, M.; Lemainque, A.; Vergne, P.; Moja, S.; Choisne, N.; Pont, C. The *Rosa* genome provides new insights into the domestication of modern roses. *Nat. Genet.* **2018**, *50*, 772–777.
- Wang, T.; Zheng, T.; Nan, M. Isolation and expression analysis of *Rh-DREB1s* gene in cut roses (*Rosa hybrida*) under ethylene treatment and water deficit stress. *Acta Hortic. Sin.* **2009**, *36*, 65–72.
